# Supplementary material for: Factors Influencing the Compliance of Pregnant Women with Iron and Folic Acid Supplementation in the Philippines: 2017 Philippine Demographic and Health Survey Analysis
Source: Nutrients. 2021 Aug 31;13(9):3060. doi: 10.3390/nu13093060 (PMC8468511; doi:10.3390/nu13093060)
Supplement: Supplementary file 1 [file nutrients-13-03060-s001.zip › nutrients-1353106-supplementary.pdf]

**Supplementary Table S1.** List of acronyms used in this article.

| <b>Acronyms</b> | <b>Explanation</b>                                         |
|-----------------|------------------------------------------------------------|
| ANC             | antenatal care                                             |
| BHW             | Barangay Health Workers                                    |
| BNS             | Barangay Nutrition Scholars                                |
| DTTB            | Doctor to the Barrios                                      |
| IFA             | iron and folic acid                                        |
| IFAS            | iron and folic acid supplementation                        |
| NNC             | National Nutrition Council                                 |
| PDOH            | Philippine Department of Health                            |
| PNDHS           | Philippine National Demographic and Health Survey          |
| RNHEALS         | Registered Nurses for Health Enhancement and Local Service |
| WHO             | World Health Organization                                  |
